# Supplementary material for: Proteomic Analysis of One-carbon Metabolism-related Marker in Liver of Rat Offspring
Source: PubMed Central journal article supplement (PMC4638034; doi:10.1074/mcp.m114.046888), 2015-09-04
Supplement: supp_M114.046888_mcp.M114.046888-1.pdf [file supp_M114.046888_mcp.M114.046888-1.pdf]

Supplemental Table 1. Chemical composition of Purina Lab. rodent chow

|                            |          |              |                                                                                                                                                    |       |         |
|----------------------------|----------|--------------|----------------------------------------------------------------------------------------------------------------------------------------------------|-------|---------|
| <b>Nutrients</b>           |          |              | Iodine                                                                                                                                             | ppm   | 1.42    |
| <b>Protein</b>             | <b>%</b> | <b>20.00</b> | Chromium                                                                                                                                           | ppm   | 0.00    |
| Arginine                   | %        | 1.26         | Selenium                                                                                                                                           | ppm   | 0.32    |
| Cystine                    | %        | 0.37         |                                                                                                                                                    |       |         |
| Glycine                    | %        | 0.87         | <b>Vitamins</b>                                                                                                                                    |       |         |
| Histidine                  | %        | 0.50         | Vitamin K                                                                                                                                          | ppm   | 6.69    |
| Isoleucine                 | %        | 0.82         | Thyamin Hydrichloride                                                                                                                              | ppm   | 11.02   |
| Leucine                    | %        | 1.47         | Riboflavin                                                                                                                                         | ppm   | 11.57   |
| Lysine                     | %        | 1.01         | Niacin                                                                                                                                             | ppm   | 217.70  |
| Methionine                 | %        | 0.33         | Pantothenic Acid                                                                                                                                   | ppm   | 88.72   |
| Phenylalanine              | %        | 0.98         | Choline Chloride                                                                                                                                   | ppm   | 3447.96 |
| Tyrosine                   | %        | 0.63         | Folic Acid                                                                                                                                         | ppm   | 13.60   |
| Threonine                  | %        | 0.72         | Pyridoxine                                                                                                                                         | ppm   | 11.00   |
| Tryptophan                 | %        | 0.25         | Biotin                                                                                                                                             | ppm   | 0.15    |
| Valine                     | %        | 0.91         | B12                                                                                                                                                | ppm   | 41.00   |
|                            |          |              | Vitamin A                                                                                                                                          | IU/g  | 28.03   |
| <b>Fat (ether extract)</b> |          | <b>4.50</b>  | Vitamin D3(added)                                                                                                                                  | IU/g  | 4.00    |
| Linoleic Acid              | %        | 1.10         | Vitamin E                                                                                                                                          | IU/Kg | 100.00  |
| Linolenic Acid             | %        | 0.12         |                                                                                                                                                    |       |         |
| Arachidonic Acid           | %        | 0.02         |                                                                                                                                                    |       |         |
| Omega-3 Fatty Acids        | %        | 1.11         |                                                                                                                                                    |       |         |
|                            |          |              |                                                                                                                                                    |       |         |
| <b>Fiber (Crude)</b>       | <b>%</b> | <b>6.00</b>  |                                                                                                                                                    |       |         |
|                            |          |              |                                                                                                                                                    |       |         |
| <b>Minerals</b>            |          |              |                                                                                                                                                    |       |         |
| <b>Ash</b>                 | <b>%</b> | <b>7.25</b>  |                                                                                                                                                    |       |         |
| Calcium                    | %        | 1.20         |                                                                                                                                                    |       |         |
| Phosphorus                 | %        | 0.62         |                                                                                                                                                    |       |         |
| Phosphorus (non-phytate)   | %        | 0.40         |                                                                                                                                                    |       |         |
| Potassium                  | %        | 0.82         | <b>Calories provided by:</b>                                                                                                                       |       |         |
| Magnesium                  | %        | 0.16         | Protein                                                                                                                                            | %     | 24.52   |
| Sulfur                     | %        | 0.22         | Fat (ether extract)                                                                                                                                | %     | 12.41   |
| Sodium                     | %        | 0.34         | Carbohydrates                                                                                                                                      | %     | 63.07   |
| Chloride                   | %        | 0.47         |                                                                                                                                                    |       |         |
| Fluorine                   | ppm      | 21.38        | *Nutrients expressed as percent of ration except where otherwise indicated. Moisture content is assumed to be 10% for the purpose of calculations. |       |         |
| Iron                       | ppm      | 112.93       |                                                                                                                                                    |       |         |
| Zinc                       | ppm      | 128.85       |                                                                                                                                                    |       |         |
| Manganese                  | ppm      | 95.49        |                                                                                                                                                    |       |         |
| Copper                     | ppm      | 22.74        |                                                                                                                                                    |       |         |
| Cobalt                     | ppm      | 0.76         |                                                                                                                                                    |       |         |
